# Supplementary material for: Enhancing CO2 electrolysis performance with various metal additives (Co, Fe, Ni, and Ru) – decorating the La(Sr)Fe(Mn)O3 cathode in solid oxide electrolysis cells
Source: Royal Society of Chemistry journal article supplement (doi:10.1039/d3qi00379e), 2023-01-01
Supplement: d3qi00379e1.pdf [file d3qi00379e1.pdf]

# Enhancing CO<sub>2</sub> electrolysis performance with various metal additives (Ru, Co, Fe, and Ni) - decorated La(Sr)Fe(Mn)O<sub>3</sub> cathode in solid oxide electrolysis cells

*Sang Won Lee*<sup>a, b</sup>, *Tae Heon Nam*<sup>a, c</sup>, *Min Kyu Kim*<sup>a</sup>, *Seokhee Lee*<sup>a</sup>, *Kyu Hyung Lee*<sup>\*c</sup>, *Jong Hyeok Park*<sup>\*b</sup>, and *Tae Ho Shin*<sup>\*a</sup>

<sup>a</sup> Korea Institute of Ceramic Engineering and Technology, Jinju-si, Gyeongsangnam-do 52851, Republic of Korea.

<sup>b</sup>Department of Chemical and Biomolecular Engineering, Yonsei University, 50 Yonsei-ro, Seodaemun-gu, Seoul, 120-749, Republic of Korea.

<sup>c</sup> Department of Materials Science & Engineering, Yonsei University, 50 Yonsei-ro, Seodaemun-gu, Seoul, 120-749, Republic of Korea.

### **Supporting Information Table of Contents:**

**Figure S1** (a) Cross-sectional SEM image of LSGM supported cell with LSFM electrode (b) SEM image of pristine LSFM electrode with high magnification.

**Figure S2.** CO<sub>2</sub> electrolysis performance of the cell using an LSFM electrode with different metal additives feeding 50% CO<sub>2</sub> - 50% CO at various temperatures; (a) LSFM, (b) LSFM-Ru, (c) LSFM-Co, (d) LSFM-Fe, and (e) LSFM-Ni

**Figure S3.** Impedance spectra of the LSFM electrode with and without different metal additives at various temperatures under 50% CO<sub>2</sub> - 50% CO; (a) LSFM, (b) LSFM-Ru, (c) LSFM-Co, (d) LSFM-Fe, and (e) LSFM-Ni.

**Figure S4.** DRT plot from the EIS of the LSFM electrode with and without different metal additives at various temperatures under 50% CO<sub>2</sub> - 50% CO; (a) LSFM, (b) LSFM-Ru, (c) LSFM-Co, (d) LSFM-Fe, and (e) LSFM-Ni.

**Figure S5** SEM images of metal-infiltrated LSFM electrode after cell test for CO<sub>2</sub> Reduction; (a) LSFM-Ru, (b) LSFM-Co, (c) LSFM-Fe, and (d) LSFM-Ni.

## SUPPORTING INFORMATION

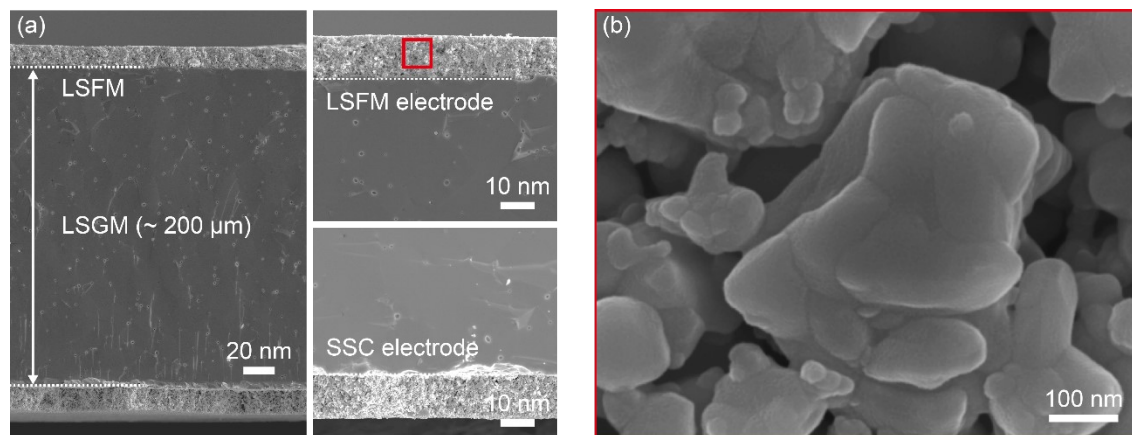

**Figure S1** (a) Cross-sectional SEM image of LSGM supported cell with LFSM electrode (b) SEM image of pristine LFSM electrode with high magnification.

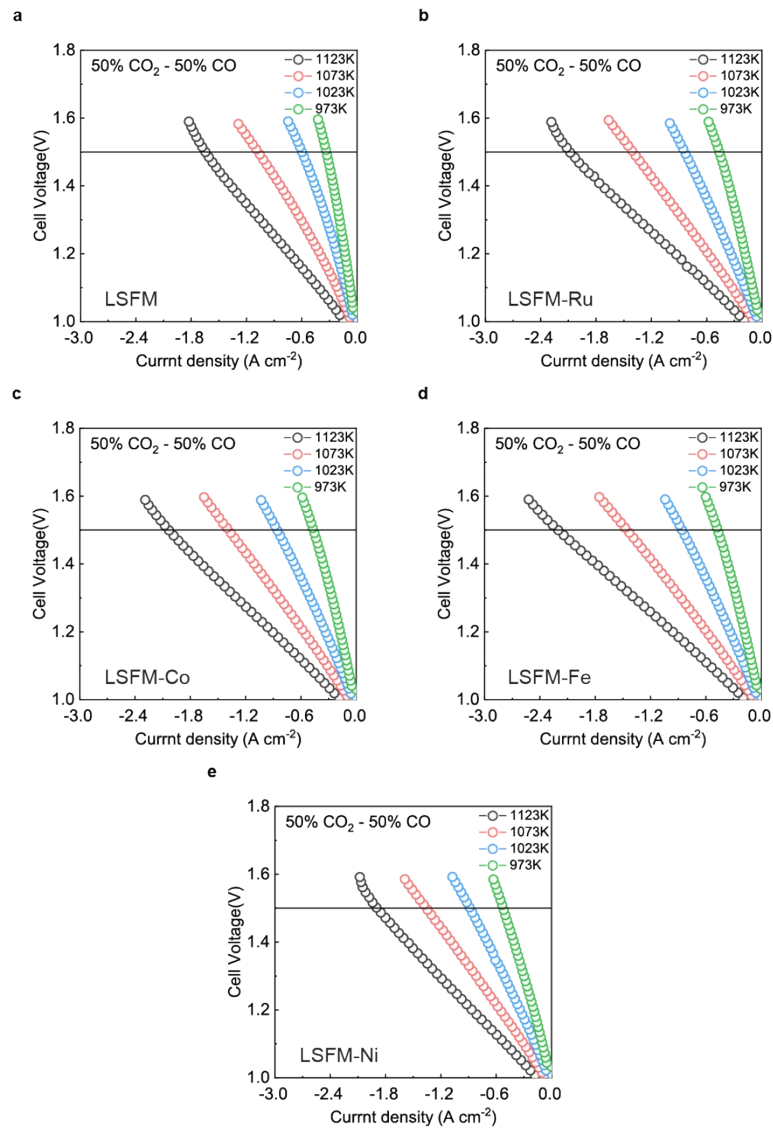

**Figure S2.** CO<sub>2</sub> electrolysis performance of the cell using an LSFM electrode with different metal additives feeding 50% CO<sub>2</sub> - 50% CO at various temperatures; (a) LSFM, (b) LSFM-Ru, (c) LSFM-Co, (d) LSFM-Fe, and (e) LSFM-Ni.

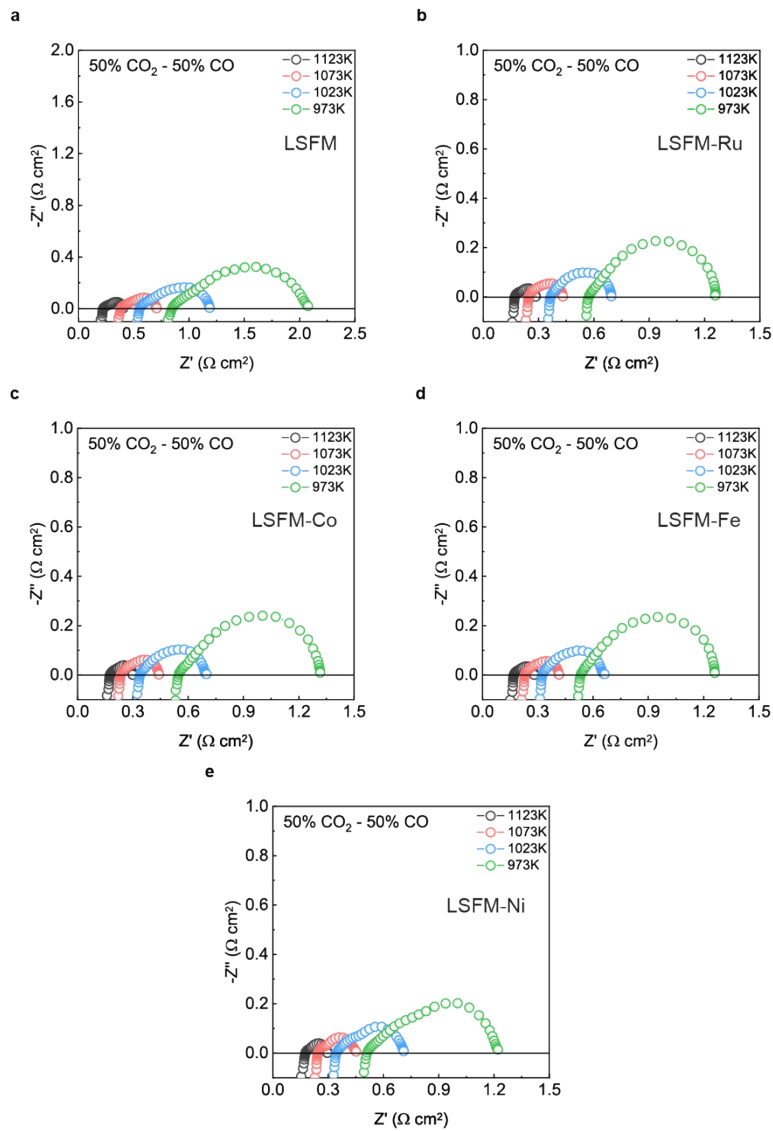

**Figure S3.** Impedance spectra of the LSFM electrode with and without different metal additives at various temperatures under 50% CO<sub>2</sub> - 50% CO; (a) LSFM, (b) LSFM-Ru, (c) LSFM-Co, (d) LSFM-Fe, and (e) LSFM-Ni.

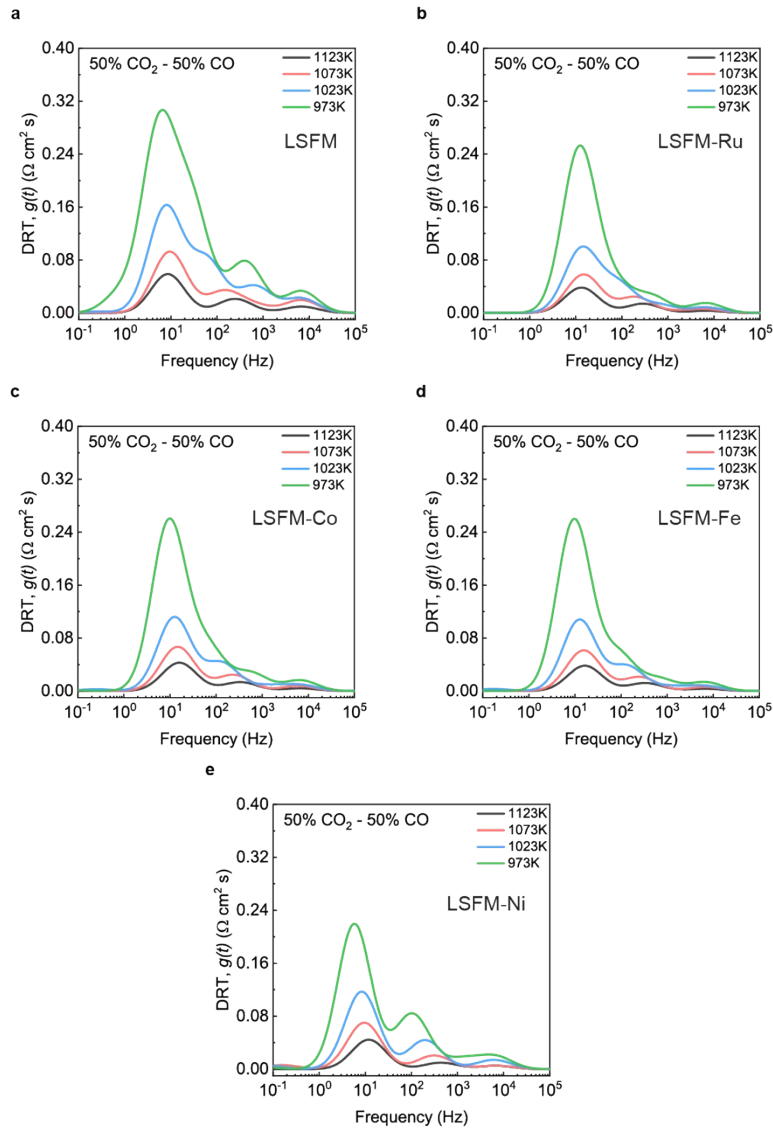

**Figure S4.** DRT plot from the EIS of the LSFM electrode with and without different metal additives at various temperatures under 50%  $\text{CO}_2$  - 50% CO; (a) LSFM, (b) LSFM-Ru, (c) LSFM-Co, (d) LSFM-Fe, and (e) LSFM-Ni.

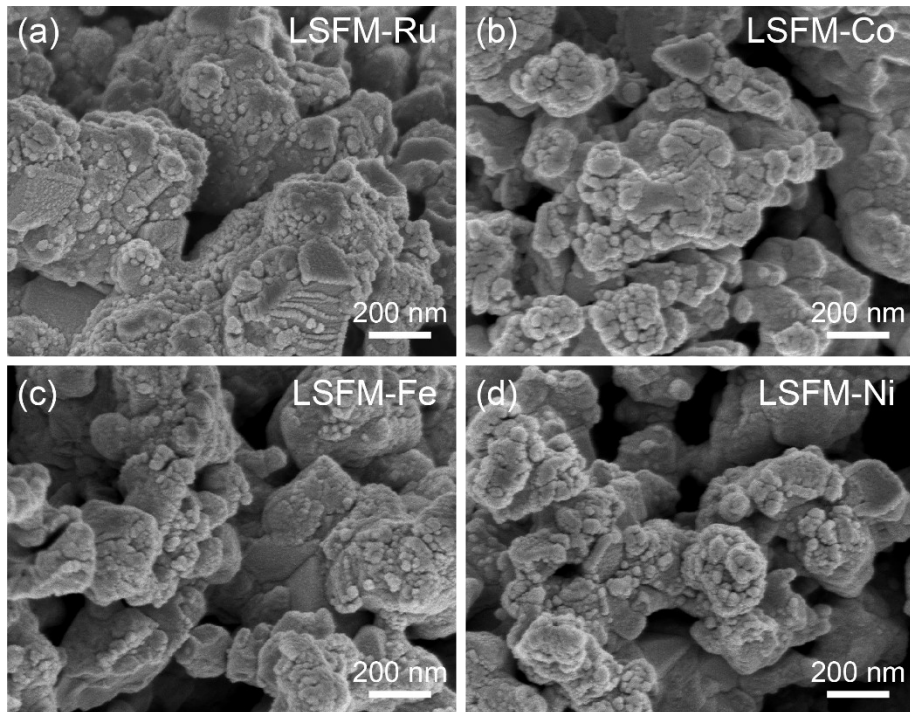

**Figure S5** SEM images of metal-infiltrated LSFM electrode after cell test for CO<sub>2</sub> Reduction; (a) LSFM-Ru, (b) LSFM-Co, (c) LSFM-Fe, and (d) LSFM-Ni.
